# Supplementary material
Source: ML conference proceedings conference paper supplement (https://proceedings.neurips.cc/paper_files/paper/2022/hash/057405fd73dd7ba7f32a7cb34fb7c7f5-Abstract.html)
Supplement: Supplementary file 1 [file 057405fd73dd7ba7f32a7cb34fb7c7f5-Supplemental-Conference.zip]

Archive with 2 entries (2 files):
- Full paper.pdf
- __MACOSX/._Full paper.pdf
